# Supplementary material for: Scale-dependency of extreme precipitation processes in regional climate simulations of the greater Alpine region
Source: Copernicus journal article supplement (doi:10.5194/wcd-2022-11), 2022-03-08
Supplement: Supplementary file 1 [file wcd-2022-11-supplement.pdf]

Supplementary material

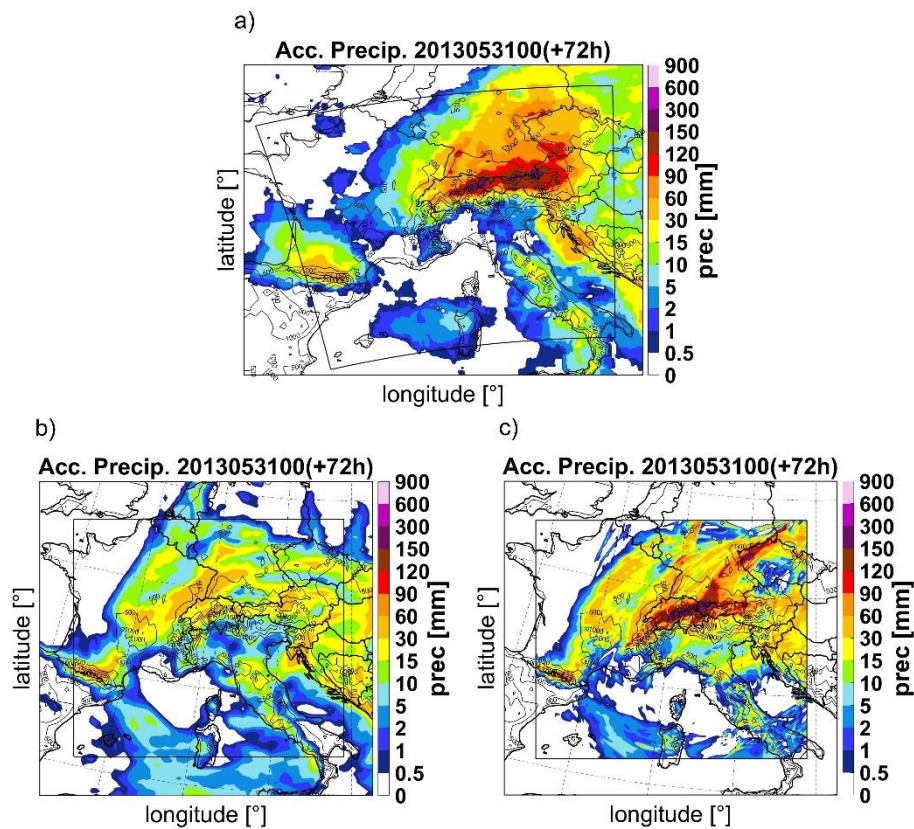

Figure S1. Spatial distribution of 72h accumulated precipitation for the event 31-May-2013 as observed by MSWEP-11km (a) and simulated by RCM (b) and CPM (c). The contours represent the surface height.

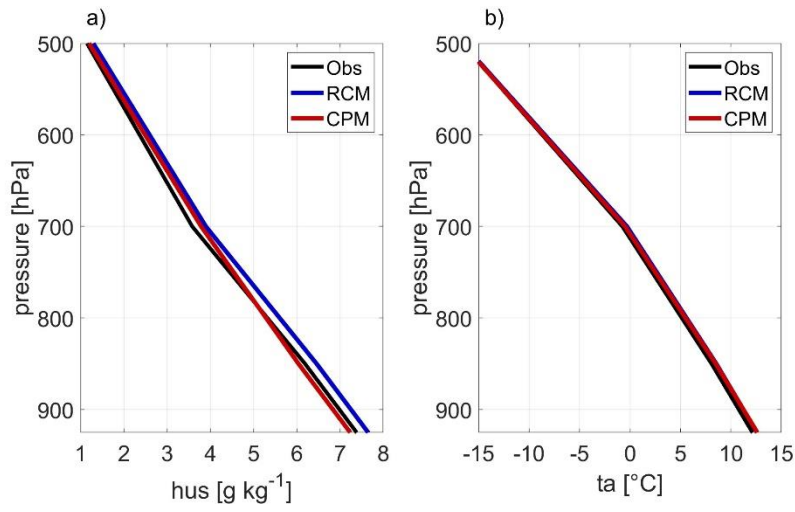

**Figure S2. Vertical profiles of specific humidity (a) and temperature (b), timely averaged for all time steps of the 8 selected events in Tab. 3 for 11 stations. The UWYO soundings are shown in black, RCM in blue and CPM in red. The corresponding MB and RMSE are shown in Fig. 7.**

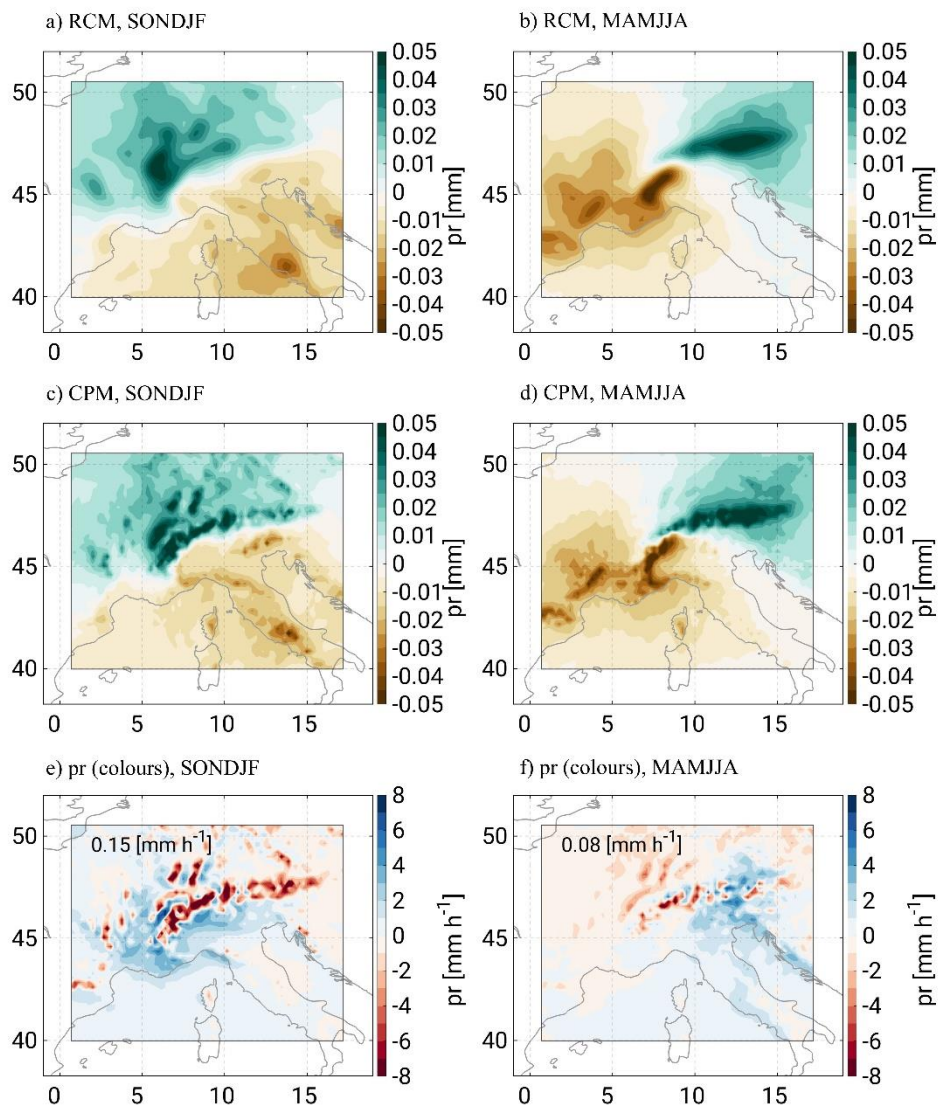

**Figure S3.** As Fig. 9 but for EOF-2.

15

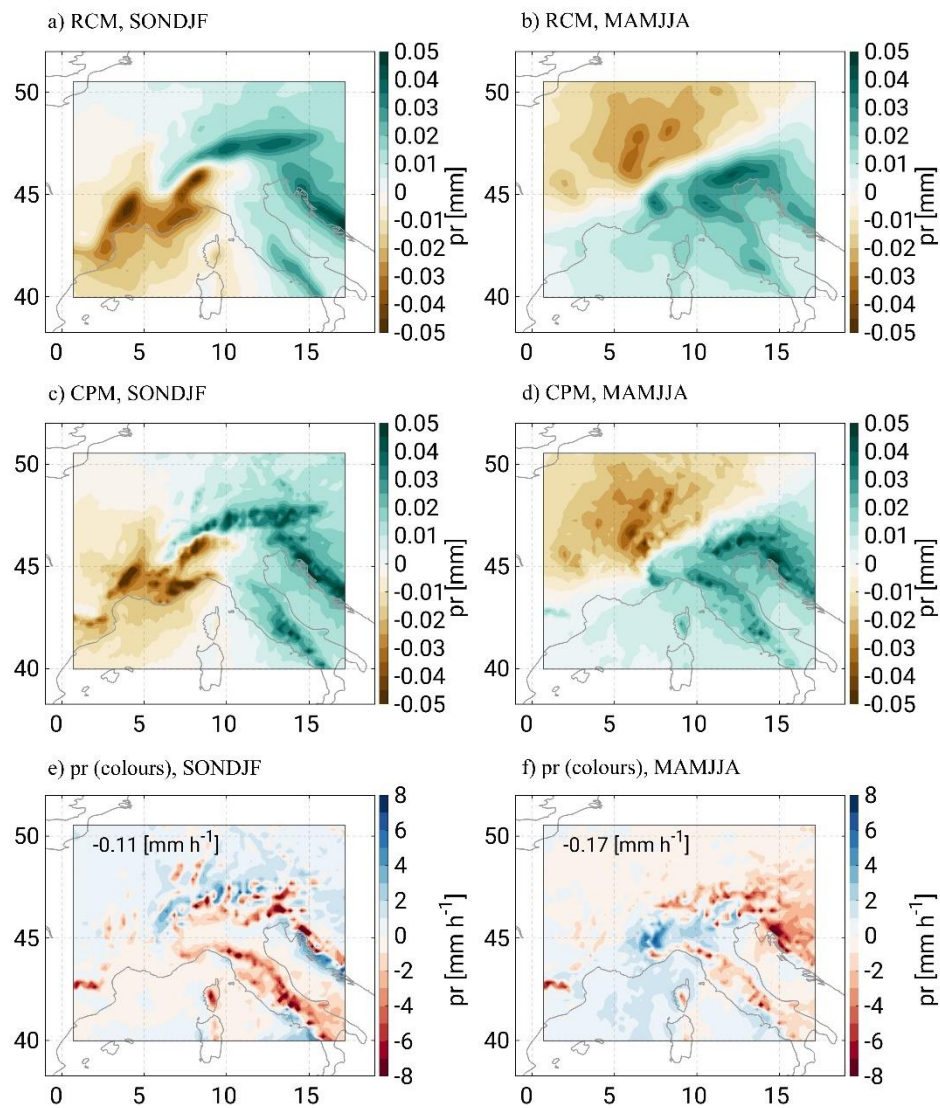

**Figure S4.** As Fig.9 but for EOF-3.

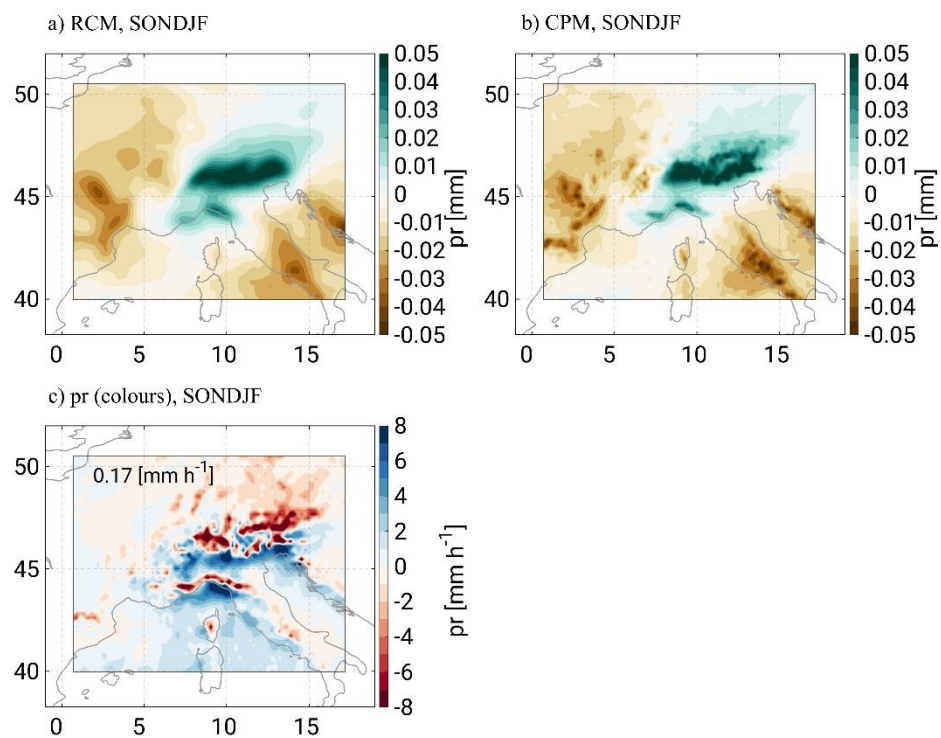

**Figure S5.** As Fig.9 but for EOF-4



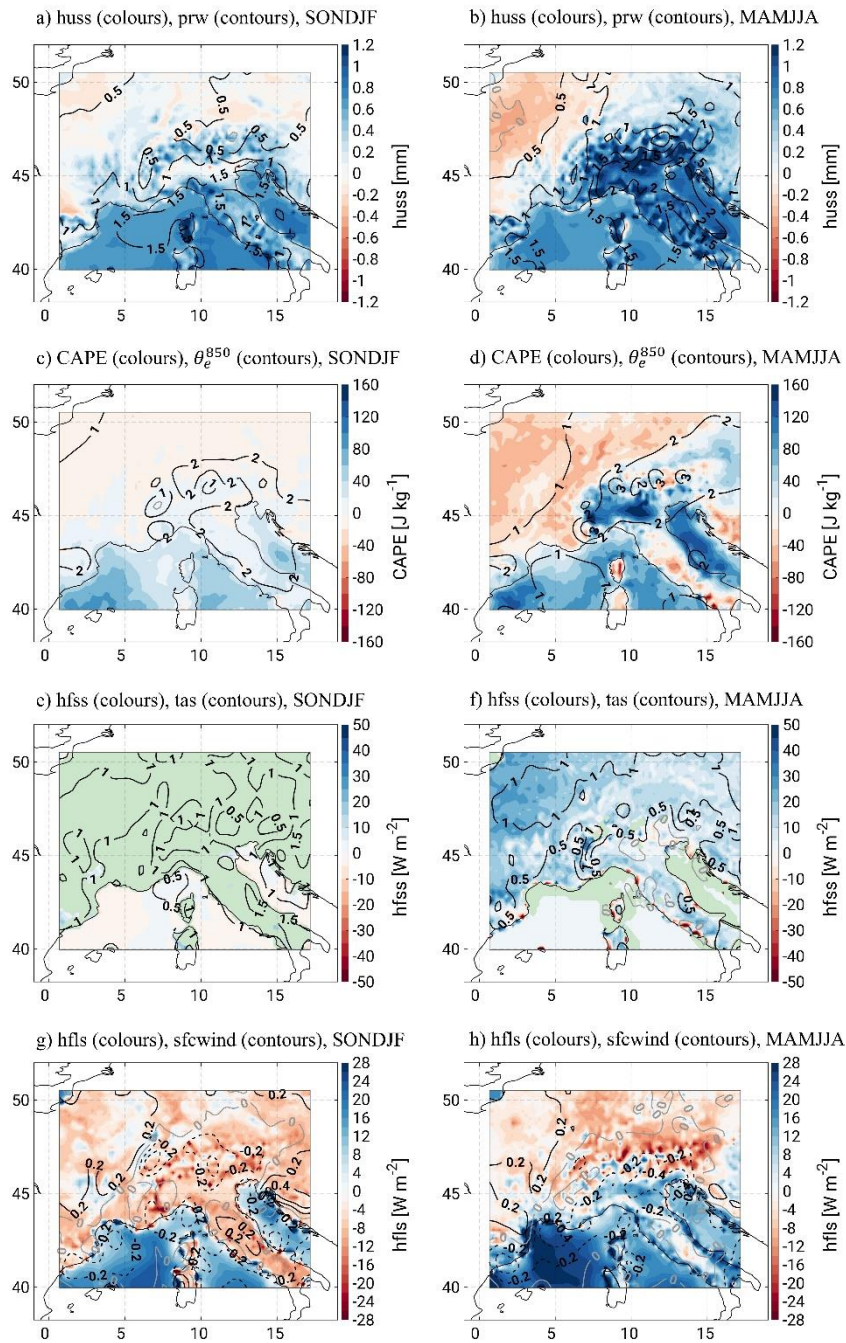

Figure S6. As Fig. 10 but for EOF-2

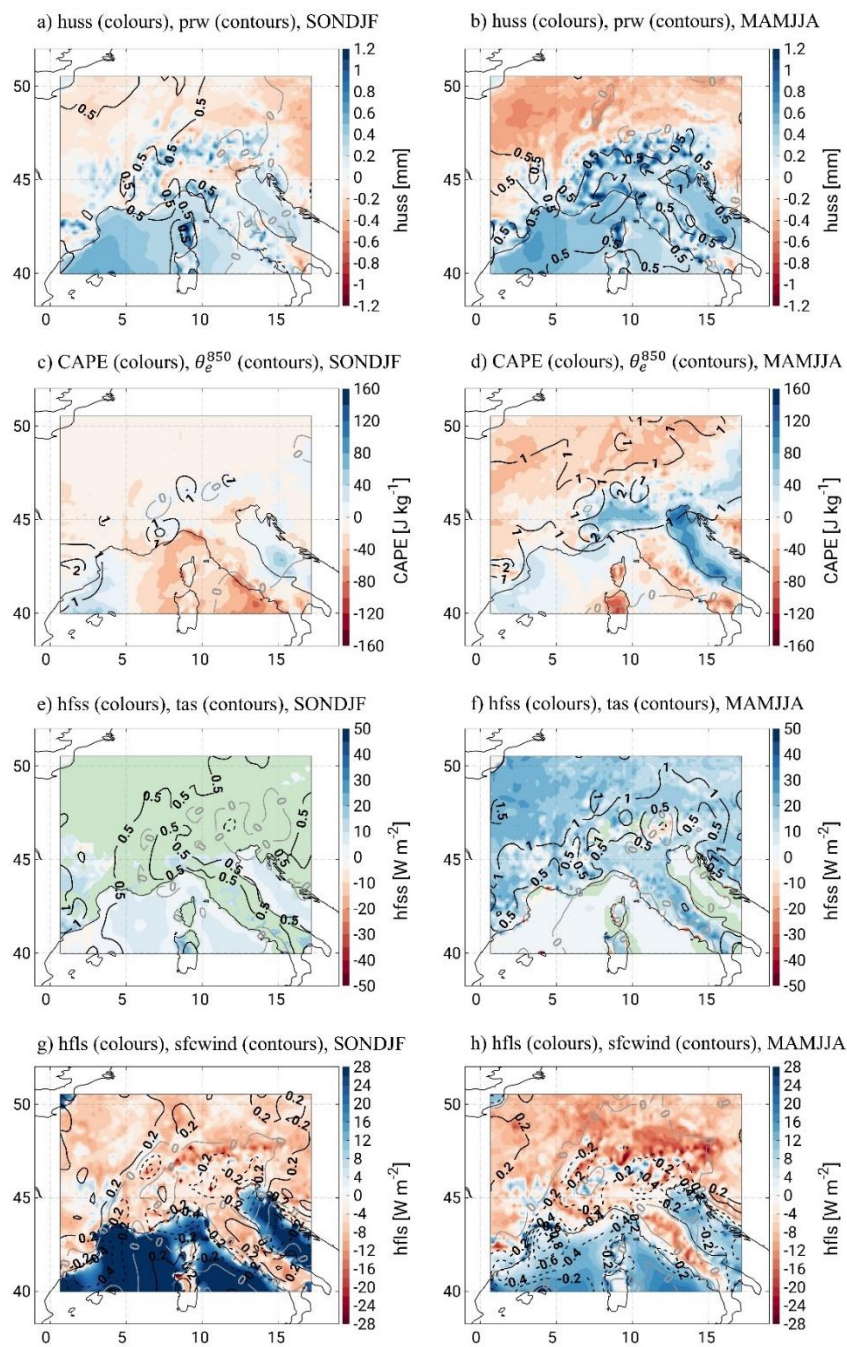

Figure S7. As Fig. 10 but for EOF-3

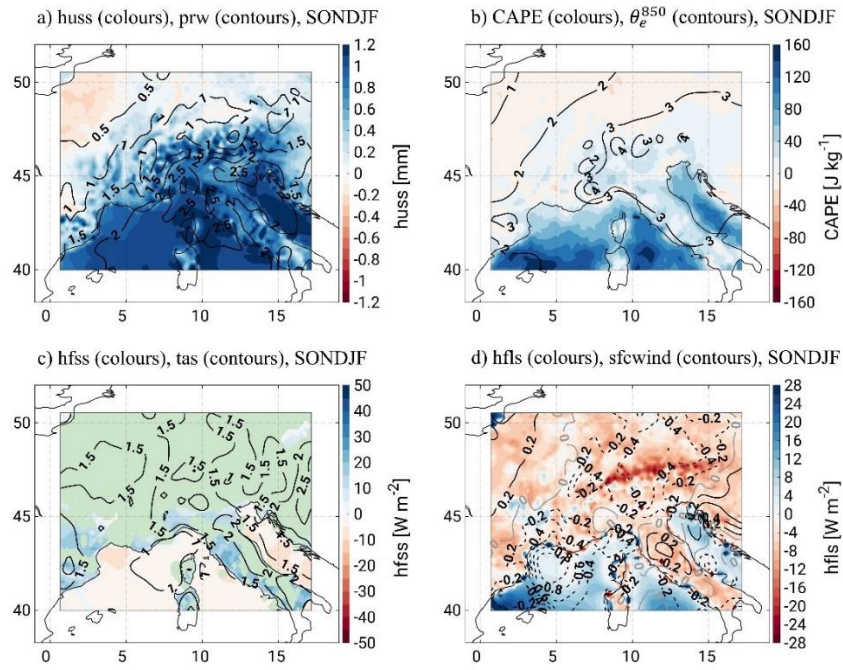

Figure S8. As Fig. 10 but for EOF-4
